# Supplementary material
Source: PubMed Central journal article supplement (PMC2897358)
Supplement: supp_192_14_3678__1.pdf [file supp_192_14_3678__1.pdf]

Table S1. *Caulobacter crescentus* NA1000 genome sequencing and assembly statistics.

|                          | Run data | Paired end |
|--------------------------|----------|------------|
| Number of runs           | 1.5      | 0.5        |
| Runs assembled           | 738,099  | 96,978     |
| Average read length (bp) | 251      | 94         |
| Number of base pairs     |          | 4,000,673  |
| Number of contigs        |          | 151        |
| N50 contig size (bp)     |          | 52,555     |
| Largest contig size (bp) |          | 177,486    |
| Depth of coverage        |          | 24X        |
