# Supplementary material
Source: PubMed Central journal article supplement (PMC2897358)
Supplement: supp_192_14_3678__2.pdf [file supp_192_14_3678__2.pdf]

Table S2. Errors in the 454 sequence data.

| Error Number | CB15 Position | NA1000 Position | Type of Error               |
|--------------|---------------|-----------------|-----------------------------|
| 1            | 412882        | 412882          | del C (3 Cs)                |
| 2            | 412887        | 412887          | del A (2 As)                |
| 3            | 415335        | 415335          | del C (8 Cs)                |
| 4            | 873225        | 899256          | del C (11 Cs)               |
| 5            | 895596.5      | 921627.5        | ins G (low complexity GC)   |
| 6            | 895612        | 921643          | del G (14 Gs)               |
| 7            | 895615        | 921646          | del G (low complexity)      |
| 8            | 919330        | 945361          | del TC                      |
| 9            | 919337        | 945368          | del C                       |
| 10           | 1103054       | 1129031         | del C (5 Cs)                |
| 11           | 1187329       | 1213306         | del G (8 Gs)                |
| 12           | 1836273       | 1862249         | del G (4 Gs)                |
| 13           | 2630428       | 2656409         | del A (7 As)                |
| 14           | 2641035       | 2667017         | C to G                      |
| 15           | 3177003.5     | 3202984.5       | ins G (low complexity GC)   |
| 16           | 3221999       | 3247984         | del G (12 Gs)               |
| 17           | 3529202.5     | 3555191.5       | ins C (6 Cs)                |
| 18           | 3741581       | 3767563         | del C (in string of 16 Gs)  |
| 19           | 3741583       | 3767565         | G to C (in string of 16 Gs) |
| 20           | 3932765       | 3958747         | del C (9 Cs)                |
