# Supplementary material
Source: PubMed Central journal article supplement (PMC2897358)
Supplement: supp_192_14_3678__3.pdf [file supp_192_14_3678__3.pdf]

Table S3. Sequencing errors in the CB15 genome and the corrected versions represented in the NA1000 genome.

| Error number <sup>1</sup> | CB15 position <sup>2</sup> | NA1000 position <sup>3</sup> | Gene annotation <sup>4</sup>                        | CB15 gene number <sup>2</sup> | NA1000 gene number <sup>3</sup> | Erroneous allele <sup>5</sup> | Corrected allele <sup>5</sup> | Type <sup>6</sup> |
|---------------------------|----------------------------|------------------------------|-----------------------------------------------------|-------------------------------|---------------------------------|-------------------------------|-------------------------------|-------------------|
| 21                        | 48812.5                    | 48813                        | hypothetical cytosolic protein                      | CC_0046                       | CCNA_00044                      | -                             | T                             | I                 |
| 22                        | 56861                      | 56861.5                      | tRNA 2-methylthioadenosine synthase                 | CC_0056                       | CCNA_00054                      | C                             | -                             | I                 |
| 23                        | 76045                      | 76045                        | HemY domain membrane protein                        | CC_0075                       | CCNA_00073                      | T                             | G                             | S                 |
| 24                        | 162144.5                   | 162145                       | heat-inducible transcription repressor, <i>hrcA</i> | CC_0153                       | CCNA_00152                      | -                             | G                             | I                 |
| 25                        | 162157                     | 162157.5                     | heat-inducible transcription repressor, <i>hrcA</i> | CC_0153                       | CCNA_00152                      | C                             | -                             | I                 |
| 26                        | 361895                     | 361895                       | Intergenic                                          | CC_0342-0343                  | CCNA_00346-00347                | C                             | T                             | I/NC              |
| 27                        | 712701                     | 738731                       | Intergenic                                          | CC_0645-0646                  | CCNA_00682-00683                | T                             | G                             | I/NC              |
| 28                        | 723511                     | 749541                       | PAS-family GGDEF/EAL protein                        | CC_0655                       | CCNA_00692                      | C                             | G                             | NS                |
| 29                        | 824099.5                   | 850130                       | hypothetical protein                                | CC_0749                       | CCNA_00786                      | -                             | T                             | I                 |
| 30                        | 1056600-1046653            | 1082630.5                    | hypothetical protein/IS element                     | CC_0949-CC_0950               | CCNA_01000/CCNA_IS023           | 54 bp                         | -                             | I/NC              |
| 31                        | 1268666                    | 1294642.5                    | Intergenic                                          | CC_1117-1118                  | CCNA_01174-01175                | G                             | -                             | I/NC              |
| 32                        | 1656828-1656839            | 1682979.5                    | Intergenic                                          | CC_1497-1498                  | CCNA_01565-CCNA_01566           | AAGAGAGAGGGA                  | -                             | I/NC              |
| 33                        | 1958549                    | 1984525                      | major facilitator superfamily transporter           | CC_1774                       | CCNA_01852                      | C                             | G                             | S                 |
| 34                        | 2119218                    | 2145194                      | Intergenic                                          | CC_1921-1922                  | CCNA_01998-01999                | T                             | G                             | NC                |
| 35                        | 2119221                    | 2145197                      | Intergenic                                          | CC_1921-1922                  | CCNA_01998-01999                | T                             | C                             | NC                |
| 36                        | 2119229                    | 2145205                      | Intergenic                                          | CC_1921-1922                  | CCNA_01998-01999                | A                             | G                             | NC                |
| 37                        | 2136567                    | 2162543                      | NADH-quinone oxidoreductase chain N                 | CC_1937                       | CCNA_02015                      | A                             | G                             | S                 |
| 38                        | 2403008                    | 2428985-2428988              | Intergenic                                          | CC_2194-2195                  | CCNA_02277-02278                | -                             | CGCG                          | I/NC              |
| 39                        | 2411028                    | 2437008                      | tRNA synthetase class I, catalytic domain protein   | CC_2205                       | CCNA_02288                      | C                             | T                             | NS                |
| 40                        | 2455419                    | 2481400                      | Intergenic                                          | CC_2258-2259                  | CCNA_02341                      | -                             | C                             | I/NC              |
| 41                        | 2704184                    | 2730166                      | cytochrome P450                                     | CC_2494                       | CCNA_02579                      | C                             | G                             | NS                |
| 42                        | 2761571                    | 2787556.5                    | Intergenic                                          | CC_2552-2553                  | CCNA_02635-02636                | C                             | -                             | I/NC              |
| 43                        | 2766758                    | 2792741.5                    | phospho-N-acetylmuramoyl-pentapeptide transferase   | CC_2557                       | CCNA_02640                      | C                             | -                             | I/NC              |
| 44                        | 2815721                    | 2841701                      | Intergenic                                          | CC_2604-2605                  | CCNA_02687-02688                | G                             | C                             | I/NC              |
| 45                        | 2986972                    | 3012952                      | chaperone protein, <i>dnaJ</i>                      | CC_2772                       | CCNA_02860                      | A                             | G                             | NS                |
| 46                        | 3004624                    | 3030603                      | Intergenic                                          | CC_2791-2792                  | CCNA_02881-02882                | G                             | C                             | NC                |
| 47                        | 3004630                    | 3030608.5                    | Intergenic                                          | CC_2791-2792                  | CCNA_02881-02882                | T                             | -                             | I/NC              |
| 48                        | 3124497                    | 3150478                      | Intergenic                                          | CC_2900-2901                  | CCNA_02994-02995                | -                             | G                             | I/NC              |
| 49                        | 3158214                    | 3184195                      | 3-deoxy-manno-octulosonate cytidyltransferase       | CC_2934                       | CCNA_03029                      | A                             | G                             | S                 |
| 50                        | 3163968                    | 3189949                      | tyrosine phenol-lyase                               | CC_2940                       | CCNA_03035                      | T                             | G                             | S                 |
| 51                        | 3163974                    | 3189955                      | tyrosine phenol-lyase                               | CC_2940                       | CCNA_03035                      | G                             | G                             | S                 |
| 52                        | 3195323                    | 3221304-3221407              | Intergenic                                          | CC_2975-2976                  | CCNA_03070-3071                 | -                             | CGCG                          | I/NC              |
| 53                        | 3240112                    | 3266097                      | hypothetical protein/IS element                     | CC_3021-3022                  | CCNA_03116                      | A                             | G                             | NC                |
| 54                        | 3283569                    | 3309555                      | hypothetical protein                                | CC_3057                       | CCNA_03153                      | -                             | C                             | I/NC              |
| 55                        | 3351760                    | 3377746                      | hypothetical protein                                | CC_3117                       | CCNA_03216                      | G                             | C                             | NS                |
| 56                        | 3392424                    | 3418413-3418415              | Intergenic                                          | CC_3146-3147                  | CCNA_03248-03249                | -                             | GGC                           | I/NC              |
| 57                        | 3570312                    | 3596301                      | aldolase 1-epimerase                                | CC_3323                       | CCNA_03432                      | A                             | G                             | NS                |
| 58                        | 3638746                    | 3664738                      | Intergenic                                          | CC_3395-3396                  | CCNA_03506-03507                | -                             | G                             | I/NC              |
| 59                        | 3687714                    | 3713704                      | hypothetical protein                                | CC_3444                       | CCNA_03557                      | -                             | G                             | I                 |
| 60                        | 3730223                    | 3756228.5                    | patatin family phospholipase domain protein         | CC_3488                       | CCNA_03602                      | ATGTGCTGG                     | -                             | I                 |
| 61                        | 3762779                    | 3788761                      | hypothetical protein                                | CC_3519                       | CCNA_03634                      | T                             | C                             | NS                |
| 62                        | 3785933                    | 3811915                      | ATP-dependent nuclease A subunit                    | CC_3538                       | CCNA_03652                      | G                             | T                             | NS                |
| 63                        | 3796031                    | 3822013                      | hypothetical protein                                | CC_3548                       | CCNA_03662                      | T                             | C                             | S                 |
| 64                        | 3960349                    | 3986331                      | cell division protein, <i>ftsK</i>                  | CC_3704                       | CCNA_03819                      | A                             | C                             | NS                |
| 65                        | 4003781                    | 4029763                      | DNA polymerase III, delta subunit                   | CC_3751                       | CCNA_03867                      | G                             | C                             | NS                |

<sup>1</sup>Errors numbers are continued from Table S2.

<sup>2</sup>Postitions and gene numbers for CB15 are consistent with the published genome sequence, GenBank Accession AE005673.

<sup>3</sup>Postitions and gene numbers for NA1000 are consistent with the newly assembled and annotated genome, GenBank Accession CP001340.

<sup>4</sup>Gene annotations were determined using the Integrated Genomics gene annotation algorithm and comparison with protein sequences in GenBank.

<sup>5</sup>Erroneous and corrected alleles are represented in the CB15 (AE005673) and NA1000 (CP001340) genome sequences, respectively

<sup>6</sup>Type of mutation: I = insertion/deletion, NC = non-coding, S = synonymous, NS = non-synonymous
